# Supplementary material for: Exosomal miRNAs as Novel Pharmacodynamic Biomarkers for Cancer Chemopreventive Agent Early Stage Treatments in Chemically Induced Mouse Model of Lung Squamous Cell Carcinoma
Source: Cancers (Basel). 2019 Apr 4;11(4):477. doi: 10.3390/cancers11040477 (PMC6520832; doi:10.3390/cancers11040477)
Supplement: Supplementary file 1 [file cancers-11-00477-s001.tgz]

Archive with 5 entries (5 files):
- supp table 3.xlsx
- supp table 4.xlsx
- supplementary table 1.xlsx
- supplementary table 5.xlsx
- supp table 2.xlsx
