# Supplementary material for: Exosomal miRNAs as Novel Pharmacodynamic Biomarkers for Cancer Chemopreventive Agent Early Stage Treatments in Chemically Induced Mouse Model of Lung Squamous Cell Carcinoma
Source: Cancers (Basel). 2019 Apr 4;11(4):477. doi: 10.3390/cancers11040477 (PMC6520832; doi:10.3390/cancers11040477)
Supplement: Supplementary file 1 [file cancers-11-00477-s001.tgz › supp table 2.xlsx]

## Sheet: Sheet1
Differentially expressed exosomal miRNAs affected by AZD6244 treatment.
Rank	miRNA ID	mean EbA (log2)	mean EaA (log2)	P value	Fold Change	False discovery rate (B&H)
1	mmu-miR-149-5p	8.586	6.707	0	-1.879	0.012
2	mmu-miR-24-2-5p	5.737	7.2	0	1.463	0.012
3	mmu-miR-27a-3p	9.493	10.636	0	1.143	0.012
4	mmu-miR-215-5p	9.917	11.846	0	1.929	0.023
5	mmu-miR-543-3p	12.329	11.283	0.001	-1.046	0.035
6	mmu-miR-92b-3p	11.735	11.56	0.001	-0.175	0.041
7	mmu-miR-192-5p	10.437	11.537	0.002	1.1	0.041
8	mmu-miR-744-5p	13.204	12.14	0.002	-1.064	0.041
9	mmu-miR-127-3p	14.271	13.783	0.002	-0.488	0.053
10	mmu-miR-6240	6.926	5.019	0.003	-1.907	0.055
11	mmu-miR-375-3p	8.437	9.27	0.005	0.833	0.088
12	mmu-miR-146a-5p	9.553	10.365	0.006	0.812	0.098
13	mmu-miR-10b-5p	10.39	11.669	0.006	1.279	0.101
14	mmu-miR-223-5p	5.995	7.674	0.007	1.679	0.104
15	mmu-miR-101b-3p	5.24	7.133	0.008	1.893	0.104
16	mmu-miR-423-3p	10.602	9.796	0.009	-0.806	0.109
17	mmu-miR-669c-5p	4.931	6.388	0.009	1.457	0.109
18	mmu-miR-223-3p	4.135	5.422	0.009	1.287	0.109
19	mmu-miR-1981-5p	7.741	9.177	0.011	1.436	0.119
20	mmu-miR-23a-3p	6.876	8.304	0.012	1.428	0.119
21	mmu-miR-200a-3p	8.263	9.689	0.013	1.426	0.129
22	mmu-miR-146b-5p	8.618	9.982	0.016	1.364	0.134
23	mmu-miR-137-5p	6.98	6.212	0.016	-0.768	0.134
24	mmu-miR-194-5p	5.409	6.604	0.016	1.195	0.134
25	mmu-miR-128-3p	18.301	17.72	0.017	-0.581	0.134
26	mmu-miR-760-3p	11.519	11.028	0.017	-0.491	0.134
27	mmu-miR-129-5p	13.703	13.349	0.019	-0.354	0.146
28	mmu-miR-708-3p	11.222	11.996	0.02	0.774	0.146
29	mmu-miR-378c	7.445	8.1	0.02	0.655	0.146
30	mmu-miR-676-3p	4.802	5.738	0.022	0.936	0.149
31	mmu-miR-125b-1-3p	10.143	9.688	0.023	-0.455	0.153
32	mmu-miR-206-3p	10.284	12.174	0.024	1.89	0.153
33	mmu-miR-143-3p	13.23	13.805	0.024	0.575	0.153
34	mmu-miR-342-3p	8.576	8.085	0.026	-0.491	0.157
35	mmu-miR-200a-5p	4.716	6.387	0.027	1.671	0.162
36	mmu-miR-199a-3p	5.366	6.575	0.028	1.209	0.162
37	mmu-miR-1298-5p	8.396	9.466	0.03	1.07	0.162
38	mmu-miR-204-5p	8.045	8.844	0.03	0.799	0.162
39	mmu-miR-99a-5p	16.432	15.887	0.031	-0.545	0.162
40	mmu-miR-129b-3p	13.88	13.491	0.034	-0.389	0.176
41	mmu-miR-1839-5p	5.96	7.139	0.035	1.179	0.176
42	mmu-miR-152-3p	6.609	7.913	0.036	1.304	0.176
43	mmu-miR-184-3p	11.388	13.493	0.039	2.105	0.182
44	mmu-miR-10a-5p	9.64	10.937	0.039	1.297	0.182
45	mmu-miR-145a-3p	5.955	6.517	0.04	0.562	0.182
46	mmu-miR-1b-5p	3.923	7.084	0.041	3.161	0.185
47	mmu-miR-199b-3p	5.404	6.59	0.042	1.186	0.185
48	mmu-miR-378a-3p	11.362	11.872	0.044	0.51	0.185
49	mmu-miR-151-3p	10.35	11.29	0.044	0.94	0.185
50	mmu-miR-205-5p	5.524	7.26	0.045	1.736	0.185
51	mmu-miR-1a-3p	7.455	9.937	0.047	2.482	0.185
52	mmu-miR-101c	8.558	9.612	0.047	1.054	0.185
53	mmu-miR-27b-3p	12.243	12.899	0.048	0.656	0.185
54	mmu-miR-328-3p	12.58	11.916	0.049	-0.664	0.185
55	mmu-miR-379-5p	10.58	11.393	0.049	0.813	0.185
