# Supplementary material for: Exosomal miRNAs as Novel Pharmacodynamic Biomarkers for Cancer Chemopreventive Agent Early Stage Treatments in Chemically Induced Mouse Model of Lung Squamous Cell Carcinoma
Source: Cancers (Basel). 2019 Apr 4;11(4):477. doi: 10.3390/cancers11040477 (PMC6520832; doi:10.3390/cancers11040477)
Supplement: Supplementary file 1 [file cancers-11-00477-s001.tgz › supp table 3.xlsx]

## Sheet: Sheet1
Differentially expressed exosomal miRNAs affected by XL-147 treatment
Rank	miRNA ID	mean EbX (log2)	mean EaX (log2)	P value	Fold Change	False discovery rate (B&H)
1	mmu-miR-224-5p	4.676	6.227	0	1.551	0.023
2	mmu-miR-184-3p	9.728	13.554	0	3.826	0.025
3	mmu-miR-676-3p	4.068	5.608	0	1.539	0.031
4	mmu-miR-1198-5p	7.605	8.266	0.001	0.661	0.042
5	mmu-miR-23a-3p	6.804	8.16	0.003	1.356	0.137
6	mmu-miR-30b-5p	8.062	7.392	0.004	-0.67	0.143
7	mmu-miR-200b-3p	4.967	7.49	0.005	2.523	0.151
8	mmu-miR-423-5p	11.254	10.895	0.006	-0.359	0.151
9	mmu-miR-200a-3p	8.194	9.131	0.007	0.937	0.151
10	mmu-miR-223-5p	6.355	7.214	0.007	0.859	0.152
11	mmu-miR-200a-5p	3.994	6.346	0.008	2.352	0.157
12	mmu-miR-24-2-5p	6.046	7.154	0.01	1.108	0.169
13	mmu-miR-205-5p	5.499	7.287	0.013	1.788	0.191
14	mmu-miR-1964-3p	4.612	5.668	0.013	1.056	0.191
15	mmu-miR-203-3p	6.566	7.857	0.02	1.291	0.256
16	mmu-miR-10b-5p	10.562	11.456	0.02	0.894	0.256
17	mmu-miR-1b-5p	4.519	6.43	0.022	1.911	0.256
18	mmu-miR-194-5p	5.983	6.709	0.022	0.726	0.256
19	mmu-miR-146a-5p	9.991	10.328	0.025	0.337	0.264
20	mmu-miR-151-3p	10.302	11.295	0.025	0.993	0.264
21	mmu-miR-652-3p	5.43	5.971	0.028	0.541	0.274
22	mmu-miR-384-3p	6.962	5.702	0.031	-1.26	0.293
23	mmu-miR-10a-5p	9.704	10.678	0.042	0.975	0.373
24	mmu-miR-1981-5p	7.906	9.005	0.044	1.099	0.373
25	mmu-miR-370-3p	8.127	7.844	0.045	-0.282	0.373
26	mmu-miR-744-5p	12.802	12.396	0.048	-0.405	0.384
