# Supplementary material for: Exosomal miRNAs as Novel Pharmacodynamic Biomarkers for Cancer Chemopreventive Agent Early Stage Treatments in Chemically Induced Mouse Model of Lung Squamous Cell Carcinoma
Source: Cancers (Basel). 2019 Apr 4;11(4):477. doi: 10.3390/cancers11040477 (PMC6520832; doi:10.3390/cancers11040477)
Supplement: Supplementary file 1 [file cancers-11-00477-s001.tgz › supp table 4.xlsx]

## Sheet: Sheet1
Differentially expressed exosomal miRNAs affected by Budesonide treatment
Rank	miRNA ID	mean EbB (log2)	mean EaB (log2)	P value	Fold Change	False discovery rate (B&H)
1	mmu-miR-378c	7.148	7.725	0	0.576	0.013
2	mmu-miR-128-3p	18.32	17.752	0.002	-0.568	0.139
3	mmu-miR-378a-3p	11.106	11.661	0.003	0.555	0.139
4	mmu-miR-375-3p	8.653	9.291	0.004	0.638	0.139
5	mmu-miR-1298-5p	8.344	9.113	0.004	0.768	0.139
6	mmu-miR-212-5p	7.891	8.198	0.005	0.306	0.139
7	mmu-miR-381-3p	13.848	14.469	0.005	0.621	0.139
8	mmu-miR-149-5p	7.978	7.251	0.006	-0.727	0.139
9	mmu-miR-378b	6.793	7.404	0.007	0.612	0.139
10	mmu-miR-342-3p	8.795	7.842	0.007	-0.952	0.139
11	mmu-miR-125a-5p	12.298	10.766	0.007	-1.531	0.139
12	mmu-let-7e-5p	9.095	8.247	0.009	-0.848	0.142
13	mmu-miR-204-5p	8.446	9.096	0.009	0.65	0.142
14	mmu-miR-148a-3p	16.841	17.802	0.011	0.962	0.155
15	mmu-miR-361-5p	9.61	8.693	0.011	-0.917	0.155
16	mmu-miR-361-3p	10.912	11.374	0.014	0.462	0.186
17	mmu-miR-708-3p	11.168	11.965	0.019	0.797	0.204
18	mmu-miR-92a-3p	11.079	10.303	0.019	-0.775	0.204
19	mmu-miR-143-3p	13.128	13.71	0.022	0.582	0.204
20	mmu-miR-195a-3p	8.718	9.295	0.023	0.577	0.204
21	mmu-let-7c-1-3p	5.697	4.943	0.023	-0.754	0.204
22	mmu-miR-99b-3p	9.622	10.038	0.024	0.416	0.204
23	mmu-miR-125b-5p	12.088	10.709	0.024	-1.379	0.204
24	mmu-miR-340-3p	5.364	4.492	0.025	-0.872	0.204
25	mmu-miR-148a-5p	4.713	5.495	0.025	0.782	0.204
26	mmu-miR-543-3p	12.384	11.544	0.026	-0.839	0.204
27	mmu-miR-486a-5p	13.987	13.105	0.027	-0.881	0.204
28	mmu-miR-486b-5p	13.981	13.111	0.028	-0.871	0.204
29	mmu-miR-222-3p	13.65	13.093	0.034	-0.557	0.236
30	mmu-miR-137-5p	6.762	6.067	0.035	-0.695	0.236
31	mmu-miR-30d-5p	13.75	13.25	0.036	-0.5	0.236
32	mmu-miR-192-5p	10.459	11.027	0.036	0.569	0.236
33	mmu-miR-339-5p	5.592	4.523	0.043	-1.069	0.258
34	mmu-miR-20a-5p	7.419	5.797	0.043	-1.622	0.258
35	mmu-miR-16-5p	6.813	5.302	0.044	-1.511	0.258
36	mmu-let-7a-1-3p	5.523	4.908	0.049	-0.615	0.26
