# Supplementary material for: Exosomal miRNAs as Novel Pharmacodynamic Biomarkers for Cancer Chemopreventive Agent Early Stage Treatments in Chemically Induced Mouse Model of Lung Squamous Cell Carcinoma
Source: Cancers (Basel). 2019 Apr 4;11(4):477. doi: 10.3390/cancers11040477 (PMC6520832; doi:10.3390/cancers11040477)
Supplement: Supplementary file 1 [file cancers-11-00477-s001.tgz › supplementary table 1.xlsx]

## Sheet: Sheet1
Mapped reads of the top 100 miRNAs (log2)
miRNA ID	EaA1	EaA2	EaA3	EaA4	EaA5	EaA6	EaAB1	EaAB2	EaAB3	EaAB4	EaAB5	EaAB6	EaB1	EaB2	EaB3	EaB4	EaB5	EaB6	EaD1	EaD2	EaD3	EaD4	EaD5	EaD6	EaG1	EaG2	EaG3	EaG4	EaG5	EaG6	EaX1	EaX2	EaX3	EaX4	EaX5	EaX6	EbA1	EbA2	EbA3	EbA4	EbA5	EbA6	EbAB1	EbAB2	EbAB3	EbAB4	EbAB5	EbAB6	EbB1
mmu-miR-128-3p	17.4601	17.5465	18.0204	17.5338	17.6823	18.0797	18.1868	17.8178	17.85	17.9531	18.557	17.4311	17.8919	17.8618	17.7051	17.6758	17.9631	17.4113	17.843	18.2345	18.2612	17.7528	17.6584	17.9585	18.7132	18.2453	17.3286	18.2871	17.9123	17.9763	18.1971	17.8374	18.125	18.3637	18.0593	17.9555	18.2157	18.239	18.2699	18.6833	18.3083	18.0889	18.0317	17.5544	17.0377	17.7816	18.3195	17.8971	18.5584
mmu-miR-148a-3p	17.9948	17.8131	17.8459	15.4833	17.6138	18.0227	17.3686	17.3973	17.3309	17.2676	16.9007	18.0945	17.9288	17.9586	18.1264	17.2534	17.3208	18.2259	15.9958	17.3265	17.3165	17.7503	17.0226	17.1656	16.7272	17.1841	16.2727	16.428	17.1558	16.9673	17.5141	17.665	17.6604	17.894	17.5803	16.9656	17.193	17.7005	16.8123	16.9446	17.221	17.1767	17.0133	17.6357	17.8468	17.8177	16.6395	17.4158	16.7065
mmu-miR-99a-5p	16.0255	16.0501	15.9431	14.9941	16.3474	15.9631	16.0128	16.511	16.5603	15.0258	16.226	15.6434	15.3737	16.2256	16.0779	16.6213	16.4722	15.241	15.1902	16.0782	16.3126	15.3467	16.1373	15.8104	15.9767	16.0422	14.8619	16.1624	15.8781	16.4581	16.7349	16.0477	16.1647	16.1119	16.206	15.8526	16.3344	16.0783	16.4681	16.3173	16.7039	16.6877	15.7638	16.3246	15.2392	16.2608	16.1559	15.9148	16.0569
mmu-let-7i-5p	15.1678	15.5394	15.3446	15.5287	14.8445	14.851	15.5089	15.7629	15.773	16.2014	15.2377	16.1291	16.0865	15.3198	14.581	14.9444	16.0426	16.2017	15.2123	15.1892	15.033	15.5251	14.9317	15.8082	15.3084	15.4588	14.5773	15.4693	15.7141	15.1948	14.9916	15.3908	15.0883	14.6773	14.9665	15.2622	15.5705	14.9755	15.0716	14.381	14.8819	14.744	15.6354	15.4353	14.8383	15.5263	15.6399	14.8169	15.4687
mmu-let-7b-5p	15.1101	15.0638	14.8099	15.6702	14.36	14.4333	15.0194	14.76	14.9792	15.8528	15.0335	14.9191	15.3092	14.9371	14.9016	14.7213	15.1026	14.9413	15.699	15.1557	15.0509	15.4726	14.7539	15.8339	15.6897	15.2306	15.7542	15.9643	15.0618	14.9685	14.5108	14.9165	14.7194	14.5624	14.567	15.1623	15.6404	15.1466	15.5296	14.7127	14.73	14.9125	15.2309	14.8046	15.6023	14.8524	15.9863	14.8705	15.6505
mmu-miR-381-3p	13.4284	14.5855	14.3357	12.5418	14.6851	14.4601	14.1047	14.5975	14.3069	13.5485	13.7207	15.1428	14.6344	14.4468	14.4615	14.3989	14.2072	14.6649	12.6765	13.8389	14.1359	14.2361	13.7932	13.4155	13.5267	13.7436	13.1028	13.5291	13.8651	14.5423	14.2701	14.5023	14.0847	13.8348	14.3868	13.5799	14.3617	14.1947	14.1271	13.6432	14.1549	13.9695	13.6205	14.5569	12.3667	14.8622	13.9819	13.7762	13.7645
mmu-miR-127-3p	14.2244	14.4016	13.9699	12.8852	13.2452	13.9706	14.0435	13.8809	13.8796	15.4583	13.769	14.6434	15.2875	14.5768	13.933	13.6255	13.8794	15.2944	13.8416	14.061	14.4231	14.3834	13.0144	14.1463	13.8848	14.0121	13.3587	14.593	13.7781	13.5839	14.1004	14.1249	13.8659	13.736	13.6613	13.828	14.5335	14.6154	14.4993	13.6643	13.6965	14.617	14.1533	13.6848	14.3706	13.8788	14.3934	13.944	13.7634
mmu-let-7c-5p	13.8752	14.1256	13.9081	14.5463	13.1835	13.3539	13.9257	13.6087	13.8496	14.5843	13.6331	13.3023	14.4898	13.8598	13.8783	13.4092	14.1175	14.3077	14.295	14.0819	14.0346	14.276	13.6538	14.8646	14.4262	13.7328	13.6723	14.4608	14.4002	13.5005	13.6047	13.9412	13.7781	13.4145	13.2649	14.1596	14.2023	14.2147	14.2554	13.2901	13.8559	14.0975	13.6506	13.5598	14.0526	13.7667	14.4783	13.3786	14.0351
mmu-miR-218-5p	13.5406	14.3788	13.4169	13.9559	13.3313	14.1491	13.5274	15.1321	15.075	12.0831	13.7333	14.799	13.072	13.3835	12.664	13.7434	14.4388	13.3345	14.2151	13.1495	13.7989	13.1279	12.8861	12.7028	13.1804	14.3303	14.0396	12.6907	13.4765	13.8598	14.3619	14.2773	13.5809	13.2402	13.5494	13.6151	13.0175	12.96	12.9162	13.3968	14.06	13.5766	13.0563	13.7738	12.2008	14.0598	13.5949	12.9056	13.2214
mmu-miR-143-3p	14.4241	13.6573	13.5233	14.2443	13.4209	13.5619	13.857	14.1959	14.2449	13.2319	13.5544	14.6705	14.012	13.815	13.4471	13.3461	13.9473	13.6945	13.9335	14.0348	13.1814	14.0485	13.8489	14.3499	12.7762	13.8116	14.0461	13.6257	13.9973	13.4073	13.1197	13.7536	13.1841	13.4361	13.703	13.6176	13.7821	13.1377	13.5268	12.8892	13.0018	13.0441	13.9487	13.5448	14.6044	13.8534	14.0073	13.4004	13.7897
mmu-miR-129b-3p	13.5349	13.7302	13.4559	13.0418	13.4469	13.7355	13.3365	13.5728	13.3076	14.4747	13.5385	14.2183	14.1073	14.1419	13.1073	13.7969	13.3979	14.2164	13.6246	13.3211	13.9498	13.587	13.1822	13.4427	13.1457	13.576	13.8113	14.0683	13.4758	13.388	13.7085	13.8753	13.2481	13.2101	13.5136	13.5466	14.1705	13.7202	14.2969	13.5207	13.511	14.0577	13.7932	13.5362	13.2036	13.503	14.012	13.8447	13.1208
mmu-miR-486a-5p	13.4209	13.2826	13.7175	13.3638	13.8362	12.6326	13.5659	12.9728	11.6366	14.6648	13.7462	13.3296	13.0739	12.6501	13.4427	14.2498	12.3178	12.8982	14.3489	13.433	14.0108	13.9314	14.3757	13.2296	12.5183	13.7154	14.5541	13.9227	13.4158	13.6233	12.0621	13.2487	13.4667	12.8055	13.8427	14.202	13.193	13.0396	13.4734	13.1785	12.8468	13.2561	14.2278	13.9472	14.8306	12.8632	12.9948	14.3923	13.4631
mmu-miR-486b-5p	13.4125	13.2881	13.7189	13.357	13.8351	12.6285	13.5689	12.9718	11.6421	14.6642	13.7437	13.3329	13.0655	12.6559	13.4508	14.2583	12.3231	12.9094	14.3456	13.4321	14.0095	13.9298	14.3746	13.2182	12.53	13.7127	14.5572	13.9243	13.4194	13.618	12.0574	13.2432	13.4701	12.821	13.8457	14.2017	13.194	13.0351	13.4673	13.1665	12.8424	13.2604	14.2256	13.9451	14.8293	12.8571	12.9963	14.393	13.4637
mmu-miR-129-5p	13.3573	13.6266	13.3625	12.8051	13.3055	13.6361	13.2262	13.5463	13.1946	14.2349	13.4017	13.982	13.9462	14.0507	12.9721	13.6931	13.3037	14.2373	13.4678	13.168	13.8517	13.5868	12.9908	13.1156	12.9975	13.5889	13.645	13.8475	13.3222	13.2807	13.615	13.7705	13.148	13.1023	13.4157	13.4352	13.8958	13.6491	13.9723	13.3699	13.4017	13.9282	13.6956	13.434	12.9185	13.398	13.7646	13.7509	12.9551
mmu-miR-30d-5p	13.2066	13.2078	13.4638	14.3244	13.4431	12.8937	13.3536	13.1137	13.27	13.1688	13.0764	12.5558	12.8598	13.1704	13.4671	13.6046	13.3459	13.0517	14.1233	13.4118	13.2315	13.4759	13.9929	13.6003	12.9213	13.2904	13.5037	13.8232	14.0385	13.3637	13.4004	13.646	13.5224	12.9746	13.3277	13.8834	13.4764	13.364	13.8075	13.2304	13.6559	14.105	13.3168	13.4371	12.9059	13.1407	13.4843	13.2216	13.4537
mmu-miR-222-3p	13.6137	13.3002	13.576	13.0452	12.8067	13.7429	13.5347	12.7713	12.7593	13.9786	13.6251	12.4125	13.17	13.7275	12.7474	13.1402	12.8325	12.9423	13.8989	13.733	14.0877	13.5853	12.5883	13.5005	13.8682	13.5523	13.1561	13.9628	13.5263	13.1967	13.5526	13.4296	13.9086	13.6695	13.646	13.4854	13.4575	13.8957	13.768	13.6688	13.4527	13.8642	13.2847	12.8185	13.5944	13.5632	13.7292	13.2691	13.8235
mmu-miR-9-5p	12.9975	13.2574	13.1211	15.581	14.047	12.9066	13.6275	13.3123	13.5458	12.5469	12.7056	13.4618	13.2707	12.4593	12.0108	13.0196	13.5659	12.9613	14.1716	13.4955	12.5006	13.5047	13.8801	14.0161	12.8152	12.6698	14.2091	12.8606	14.3838	13.4137	12.7811	13.1247	13.3197	13.0014	13.0929	13.972	13.1432	12.4065	12.9238	13.0009	13.14	12.5601	12.7836	13.3967	12.1612	13.6213	13.1203	12.3664	13.4804
mmu-miR-139-5p	12.9132	13.4895	12.9026	12.7306	13.1385	13.2104	13.2078	13.7246	13.5302	11.6503	13.4324	12.0186	12.0734	13.3078	13.9064	14.3195	13.5699	12.4734	12.9202	12.7355	13.4472	13.1628	13.306	12.1552	13.2018	13.709	13.5011	12.4686	12.6674	14.1433	13.4305	13.4381	12.9908	12.9058	12.9146	13.2509	12.8168	13.478	12.9588	13.5772	13.7596	13.8084	13.4736	13.8382	12.8068	12.6628	12.9118	13.9061	12.8179
mmu-miR-451a	12.4765	12.9376	13.557	12.156	12.3165	12.2255	13.9154	12.9815	12.2384	10.7887	13.2914	12.8811	11.759	12.3718	12.6728	15.1988	13.2528	12.037	13.373	13.159	13.5514	12.9373	14.0599	13.0452	12.1239	13.5716	13.8597	13.2024	12.8411	15.0346	12.3914	13.0775	13.4047	12.7526	13.4996	13.3692	12.5931	11.5976	12.2772	12.6858	13.0621	12.6565	14.104	14.914	13.681	13.5391	12.6142	14.7684	13.0044
mmu-miR-100-5p	13.6449	12.9401	12.6947	14.9955	14.1053	12.2858	12.9019	13.5227	13.5174	12.4816	12.8279	13.3803	13.016	12.8375	12.893	13.4688	13.1605	13.1894	14.3895	13.0798	12.3768	13.4118	14.4066	13.4812	12.0104	13.4351	14.9362	12.8365	14.3012	13.2044	12.5912	13.6905	12.8931	12.2375	12.7674	14.3958	12.705	12.458	12.8001	12.604	12.5685	13.0451	13.8341	13.3902	13.9747	12.3611	12.9489	13.2843	12.7495
mmu-miR-99b-5p	13.6088	12.9842	13.0437	13.8181	13.2671	12.8382	13.2236	12.686	12.9085	14.5401	12.9527	13.0278	13.6677	13.6169	12.4658	12.8355	12.8325	13.7058	14.095	13.0487	13.0481	13.3909	13.0496	13.178	12.7528	13.0135	13.5273	13.3503	13.6959	12.6756	12.8034	13.0876	13.1966	12.8403	13.1765	13.4084	13.3336	13.4841	13.5312	13.2769	13.1909	13.7246	13.1887	12.6325	13.3976	12.8103	13.1112	12.9891	12.9466
mmu-miR-25-3p	13.5992	13.2002	13.08	12.5561	14.0098	12.4211	13.1436	13.097	12.2762	11.3411	12.9786	12.973	12.5329	12.8525	12.7759	13.687	12.7892	12.87	13.1422	13.037	13.1681	13.4905	13.6534	12.3452	11.7015	13.604	13.7129	12.4198	12.9706	13.2757	12.5097	12.9396	12.8797	12.3682	13.6311	13.9235	12.376	12.0659	12.4982	12.5887	12.7215	12.749	13.7287	13.4872	13.8584	12.8513	12.5135	13.5886	12.374
mmu-let-7g-5p	12.9775	12.7209	12.6033	14.6708	14.094	12.384	12.9922	13.6044	14.0199	11.61	12.2764	13.1802	12.535	12.6098	11.7336	12.6246	13.78	12.7555	12.6798	12.5026	12.151	13.2204	13.3271	13.5148	11.8653	12.5844	13.4349	12.22	13.9671	12.6143	12.7634	12.9848	12.5717	12.2933	12.2741	13.8069	12.9248	12.652	12.9341	12.8115	13.3196	12.7457	11.4895	12.7176	11.5664	12.6236	12.6468	11.6171	12.7818
mmu-miR-122-5p	12.9153	14.5263	12.0205	13.3284	11.7842	13.9347	13.0539	12.7017	12.974	13.0088	13.4489	11.8157	12.5319	11.889	13.4814	13.6145	11.5811	13.1124	14.4743	14.2966	13.163	13.5574	15.872	14.7891	12.226	12.3045	16.267	14.4326	10.8913	13.7346	11.8945	12.2183	11.4879	11.6242	13.2823	13.3557	11.9867	11.2203	13.3252	11.5187	11.0896	10.9758	14.6903	13.0357	14.0506	14.1445	14.0059	14.2743	12.6484
mmu-miR-27b-3p	12.5175	12.637	12.4605	13.9841	13.4159	12.377	12.9494	12.9321	13.103	11.1161	12.029	12.2848	11.6683	12.0544	12.0941	12.85	13.0677	12.0948	12.7848	12.788	11.8307	13.2317	13.2942	12.7784	11.9367	12.5365	13.1447	11.9828	13.5368	13.0795	12.2436	12.7481	12.6459	12.4068	12.7449	13.3263	12.5257	12.0638	12.0781	12.2187	12.5358	12.0362	12.5804	13.0168	11.8505	12.8738	12.3149	12.2098	12.5668
mmu-miR-184-3p	14.9108	14.2438	12.6927	13.9829	12.3546	12.7713	12.316	10.5347	12.13	13.8863	12.1312	13.1452	11.9006	12.5566	14.5256	13.3651	12.9337	12.478	15.5547	13.5981	11.274	11.494	13.8279	13.3845	14.0378	12.2801	14.644	13.6652	11.6135	13.9457	13.5137	13.5954	13.8907	13.6153	13.601	13.1105	10.826	12.4259	11.8801	9.6538	10.326	13.2169	14.9269	13.9781	16.6025	13.8599	11.8412	15.5886	10.594
mmu-miR-219a-2-3p	13.2848	12.5138	12.0926	13.734	13.172	12.007	12.4401	12.6382	12.7036	11.2907	11.9053	12.2129	12.084	12.4652	11.7215	12.2633	12.7217	12.2382	12.8819	12.4912	11.9425	13.1238	12.8333	12.8059	11.5287	12.5019	13.3047	12.1419	13.1243	12.2631	12.1131	12.4588	12.2724	12.1788	12.185	13.4401	12.4284	12.1882	12.46	12.5791	12.4411	12.7208	12.1306	12.3317	12.8318	12.1512	12.3694	12.1282	12.0286
mmu-miR-328-3p	11.6836	12.1986	12.067	10.7977	12.444	12.3042	12.0187	12.6191	12.8275	13.3206	12.7083	11.5515	11.918	12.5447	13.8085	12.9701	12.093	11.3441	11.1419	11.933	12.5753	12.237	12.3795	11.5694	12.5551	12.4521	10.7012	12.0953	11.9895	12.5422	12.3116	12.5559	12.5483	12.2804	11.9687	12.0545	11.9136	12.6184	12.3752	12.7026	12.8845	12.9837	11.7704	12.2306	11.2521	11.9245	12.0826	12.0948	12.5451
mmu-miR-744-5p	12.229	12.5502	12.4916	11.426	11.813	12.3281	12.1922	11.7637	12.3753	12.8185	11.7394	11.5818	12.2117	12.677	11.6186	11.7189	12.4226	12.4733	12.1429	11.8932	12.8613	12.0562	10.7974	12.0496	12.0309	11.8884	11.4598	12.7031	12.6418	11.7191	12.8998	12.2464	12.6169	12.1827	12.3544	12.0787	12.8578	13.3709	13.1379	13.03	13.218	13.6076	11.4157	11.4924	10.4616	12.7907	12.2801	11.7222	11.828
mmu-miR-140-3p	13.4528	12.5766	11.8802	12.5116	13.151	11.7551	12.3748	12.6172	12.3081	10.8858	11.8229	12.2081	11.4714	12.3206	11.2705	12.392	11.9259	11.9298	12.6432	11.7353	12.075	12.2376	11.9158	11.2747	10.5715	12.5903	13.051	11.4057	12.051	12.028	12.1527	12.3341	11.6591	11.434	12.5301	12.4755	11.8685	11.7938	12.5372	12.1143	12.04	12.7676	11.8316	12.1583	12.7065	12.0033	11.7624	12.0176	10.9736
mmu-miR-24-3p	12.2021	11.9728	12.1231	13.3116	12.6336	12.0023	12.1762	12.126	12.249	9.65023	11.6341	10.966	10.4764	11.9866	11.5402	12.8044	12.5477	10.8761	13.4741	11.824	11.934	11.7415	12.2636	11.9595	11.4933	11.9836	13.7064	11.938	11.9595	12.8702	12.545	11.966	12.2907	12.1182	12.4474	12.199	12.1913	11.3227	12.225	12.4811	12.506	12.1645	11.7064	12.5159	11.1019	12.3215	12.013	12.1836	11.7939
mmu-miR-26a-5p	11.52	12.1062	11.774	12.1664	11.5065	11.0004	12.183	12.8876	12.693	10.799	12.045	11.6812	11.7502	11.4739	11.2462	11.8066	12.6995	11.653	12.4495	12.087	11.7183	11.5873	11.3595	12.6016	12.0967	12.3097	11.1127	12.3006	12.1747	12.017	11.9997	12.0582	11.8126	11.2509	11.7171	12.0799	12.0498	11.1071	12.235	11.2679	12.0348	11.8662	11.6662	11.5564	10.4323	11.9648	12.6821	11.0397	12.332
mmu-miR-30a-5p	12.1254	12.1454	11.6963	13.5049	12.4731	11.2274	12.1721	12.0929	12.0661	10.3997	11.13	11.8808	11.5263	11.6697	11.7372	12.0603	12.0682	11.8681	13.0495	11.9296	11.2704	12.3959	12.519	11.7683	10.7406	11.9335	13.0344	11.3989	12.5876	12.0743	11.6027	12.1457	11.8618	11.1882	11.6801	12.5176	11.3248	11.3423	11.3834	11.3012	11.7638	11.9874	11.8244	12.2469	11.6056	11.6174	11.4715	11.6445	11.4106
mmu-miR-543-3p	10.9413	11.4825	11.6888	10.9619	10.9566	11.6658	11.7478	12.0397	11.6998	11.656	12.6245	10.6333	11.3396	11.6249	12.2669	11.7174	11.5534	10.764	10.9791	11.8171	12.0862	11.7217	11.6093	11.5592	12.7609	12.0225	10.816	11.9754	11.3392	11.9998	11.1288	11.6268	11.4819	11.8779	11.0853	11.6113	12.2814	12.472	12.3968	12.4638	12.1159	12.244	11.5484	11.4265	11.2331	11.0327	12.101	11.5783	12.8306
mmu-miR-708-3p	12.7487	12.1167	11.7084	11.3086	12.2415	11.8525	11.7495	12.2083	11.894	10.8717	11.4513	12.1987	12.0657	11.9635	11.3345	11.6706	12.2417	12.5161	11.7134	11.8613	11.569	12.2237	11.0699	10.5249	11.0426	12.1021	11.9626	10.1684	11.5958	11.7144	11.5732	11.8472	11.4572	11.3559	12.1055	11.3369	11.1082	11.526	10.5906	11.2836	11.4006	11.4204	12.1934	12.0494	12.4746	12.0279	10.99	11.5314	11.1387
mmu-miR-92b-3p	11.1285	11.4514	11.463	11.8533	11.8403	11.6222	11.3476	11.42	11.3689	12.6344	11.1951	10.7371	10.5362	11.3538	11.5019	12.4575	11.1186	10.7308	11.5021	10.9984	11.7584	11.4876	12.1091	11.1978	11.5473	11.3803	11.9973	11.5472	11.8601	12.3804	11.8879	11.6218	11.7068	11.2998	11.3571	11.8756	11.212	11.5966	11.6827	11.9793	12.0531	11.8854	11.4085	11.8195	10.6936	11.4088	11.2211	11.9162	11.1551
mmu-let-7a-5p	11.5108	11.2072	11.3215	13.5856	12.4083	11.1859	11.5434	11.549	11.8088	11.656	11.1484	11.166	11.5496	11.0256	10.8162	11.4005	11.4286	11.238	12.4127	11.9372	11.0359	11.8584	12.5519	12.8976	11.7889	11.4936	12.6073	11.9945	12.4659	11.4471	10.9045	11.726	11.3981	10.8153	10.9008	12.1855	11.567	11.1847	11.7552	11.0191	11.2939	11.3029	11.3968	11.5569	11.5745	11.2705	12.0332	11.0221	11.9015
mmu-miR-320-3p	11.1345	11.3692	11.2223	12.227	11.6158	11.2356	11.4133	11.5364	11.5317	11.0803	11.4686	10.3763	10.1316	11.4849	11.679	12.174	11.1399	10.0252	12.1667	10.5838	11.3882	11.3175	12.1131	12.0302	10.9327	11.3469	12.1016	12.0831	11.5497	11.7616	11.0573	11.3984	11.3496	11.2944	11.0747	11.9654	11.6931	11.6685	12.2812	11.7102	11.6615	12.2661	11.5996	11.6738	11.3894	10.7929	11.5646	11.968	11.1924
mmu-miR-378a-3p	11.9664	11.8295	11.624	11.9097	12.3256	11.5777	11.4226	11.73	11.5879	10.7023	10.981	12.0694	11.314	11.5153	11.9434	11.7122	11.5671	11.9135	12.0986	11.3036	11.2695	11.8758	11.4077	11.1159	10.3066	11.7894	12.4134	10.9307	11.4406	11.3988	11.4036	11.6349	11.6555	11.1403	11.8216	11.6068	11.1182	11.3728	11.4128	11.2764	11.2141	11.7774	11.738	11.6993	11.0883	11.5406	11.2653	11.7096	10.7889
mmu-miR-132-5p	11.3997	11.8317	11.4803	11.3314	11.1526	11.0802	11.9117	12.1524	12.3356	8.69963	11.183	9.86999	9.82241	11.4875	11.1572	11.9843	12.6206	10.509	12.2156	11.5479	11.5868	11.5145	10.69	9.77759	11.616	11.8594	11.4155	9.56429	11.6386	12.0603	12.5957	11.8093	12.0028	11.3342	12.0113	11.2652	9.82912	11.156	9.69304	11.5844	12.3096	11.6565	11.7401	11.7958	10.0053	12.0985	10.0781	11.3223	10.717
mmu-miR-423-5p	11.705	11.3243	11.268	11.274	11.2989	11.2535	11.0264	10.9429	10.8178	13.098	11.3384	11.2399	11.5877	11.3992	11.0853	10.9888	10.2387	10.8968	11.7522	10.5008	11.1021	11.2531	11.1807	11.9116	10.9588	11.1272	11.7936	12.6586	10.8937	10.8151	10.4923	10.7279	10.9594	10.9345	10.9657	11.2881	12.4896	12.1121	12.9854	11.403	11.0465	11.7985	11.2366	10.9801	12.0708	10.3805	12.1343	11.4026	11.5202
mmu-miR-125b-5p	10.5833	10.7245	10.9318	13.6675	11.6009	10.1786	11.0031	10.8725	11.5177	11.4522	11.121	10.1367	10.4613	10.3041	11.2985	11.1099	10.9467	10.1361	12.7911	11.45	10.7519	11.2514	12.344	11.9696	11.1951	10.9607	11.9748	11.6636	12.8255	11.1507	11.0183	11.303	11.6907	10.8249	10.5913	12.5545	10.9854	11.1142	11.396	11.424	11.4263	11.6375	10.6047	10.6161	9.77373	10.4347	11.2572	10.2381	11.7213
mmu-miR-181b-5p	11.0981	11.0492	11.0371	12.1369	11.7487	10.7973	11.1932	11.5768	11.7674	9.08889	11.1775	10.4828	9.8007	10.9117	11.1423	11.8725	11.4226	9.92226	12.1013	11.2642	10.8115	11.3405	11.8997	11.3056	10.8421	11.4	12.4755	11.0161	11.597	11.9907	11.1059	11.424	11.2039	10.798	11.1812	11.4141	11.3176	10.6222	11.4035	11.1262	11.2961	11.3489	11.602	11.7137	10.5643	11.5446	11.4064	11.2438	11.2431
mmu-miR-125a-5p	9.99171	10.3993	11.0732	12.8847	11.678	10.8239	11.0313	10.4066	11.2272	13.2377	11.4223	10.1991	11.4485	10.5383	11.0429	10.8108	10.4983	10.2599	12.1354	11.5346	11.0331	11.5624	12.2901	12.2982	12.0229	10.8108	11.5825	12.2435	12.3946	10.8991	10.5126	11.6268	11.4203	11.2145	10.1348	12.4198	10.737	11.4617	11.3725	11.5954	11.2902	11.7988	10.0701	10.4356	9.82395	10.0339	11.473	10.3673	12.845
mmu-miR-21a-5p	10.6105	10.8544	11.1271	13.9448	12.0529	10.7297	11.5192	11.3965	11.6681	9.85791	10.677	10.5749	10.2678	10.4378	10.5244	11.5485	11.6467	10.7865	13.0305	11.2237	10.2561	11.3101	12.3022	11.6967	10.7833	10.8106	12.8859	10.8496	12.5059	11.886	10.6946	11.3415	11.6312	10.9432	11.3696	12.0121	10.9597	10.0451	10.7563	10.4628	11.0868	10.2641	11.6482	11.7692	10.0879	11.5251	10.8899	10.9551	11.2983
mmu-miR-361-3p	11.7482	11.8428	11.05	10.6083	11.836	11.3033	11.1888	11.7734	11.3294	11.4064	11.3689	10.9438	10.8394	11.9694	11.0402	11.7898	11.4336	11.1708	11.5824	11.2612	11.5337	11.064	10.9052	10.0474	10.7323	11.8958	11.7057	10.6897	11.0283	11.2836	12.1238	11.5398	11.0406	10.7474	11.985	10.9128	10.8117	11.0306	11.1189	11.0467	11.3285	11.5599	11.3298	11.3815	11.0231	11.423	10.9193	11.5015	10.1654
mmu-miR-323-3p	10.8873	11.0075	10.6961	12.8228	11.8715	11.1296	11.0433	11.0302	10.8184	11.5983	11.1602	10.9407	11.0434	11.0996	11.3149	11.3843	10.2959	10.5794	12.2901	11.2598	11.1124	11.573	12.1367	11.3917	11.0182	11.305	12.9861	11.4066	11.699	11.5766	10.966	11.2629	11.266	10.968	10.8672	12.0524	10.9213	10.9279	11.1577	11.2871	10.7796	10.6895	11.5507	11.0742	11.5493	10.5984	11.2449	11.6104	11.1276
mmu-miR-181a-5p	10.8775	11.1317	11.0554	11.5337	11.3099	10.8463	11.0892	11.6436	11.6048	8.74681	11.1668	10.2827	9.5939	10.9084	11.4572	12.0448	11.399	10.0841	11.8296	10.8769	11.0935	10.9124	11.6688	10.9956	10.8962	11.4053	11.954	11.2319	10.9867	12.1211	11.18	11.4274	11.063	10.7252	11.0454	10.9078	11.5779	10.5725	11.5466	10.8995	11.3167	11.4206	11.6523	11.7806	10.5716	11.4185	11.3617	11.3669	11.1897
mmu-miR-206-3p	11.5708	11.7175	12.4778	13.1175	12.5169	11.6422	11.0034	10.1444	11.0746	11.7341	10.5854	11.1036	11.1775	10.2948	12.9008	12.4877	11.7974	12.4568	12.6448	11.9387	10.6653	10.8155	12.1191	11.6497	11.8314	10.9457	12.3512	11.4471	12.1235	12.0092	9.68109	10.5398	11.399	11.4306	13.6934	11.895	9.96255	10.8475	10.9598	9.19763	9.23466	11.5013	12.3371	13.15	13.5718	11.3085	11.4384	13.0838	11.2714
mmu-miR-760-3p	11.2884	11.2081	10.8615	10.8227	11.0448	10.9454	11.0051	10.7632	10.9768	11.4265	10.8972	10.0548	10.4566	11.281	10.948	11.7238	10.977	10.4189	11.1223	10.859	11.581	11.3416	11.1606	11.2034	11.0273	11.0398	11.4516	11.8242	10.9415	11.5139	11.1022	11.1279	11.01	10.9672	10.8213	11.2038	11.7075	11.1731	11.8375	11.4567	11.3721	11.5658	11.2933	11.3988	11.5924	10.9193	11.3215	11.645	10.7086
mmu-miR-379-5p	11.6781	11.1533	11.0434	12.4005	11.5925	10.4877	11.2028	11.0064	11.1899	10.9532	10.6684	11.3326	11.4797	10.8148	10.4343	10.7183	11.5785	11.9653	12.2959	11.1839	10.5922	11.5441	11.4124	11.6086	10.5343	11.578	11.9616	10.9357	12.1201	11.016	10.5215	11.5823	10.7157	10.2184	10.8532	11.4757	11.0231	10.465	10.6519	10.2103	10.5637	10.5688	11.7214	11.1271	11.8155	11.0752	11.4396	10.6729	10.9434
mmu-miR-9-3p	10.5295	10.396	10.7797	13.1614	12.0474	10.5885	10.8764	11.2074	11.7541	8.39846	10.8839	10.4083	9.60586	10.3339	10.5898	11.5594	10.9307	9.27091	11.4112	11.3732	10.5037	11.0044	12.6761	11.6542	10.4597	10.7194	12.3413	11.0844	12.2575	11.9335	11.0241	11.0193	11.3907	10.7185	10.688	11.9501	11.3031	10.1133	11.1386	11.0416	11.3109	10.4337	10.348	11.3921	9.7544	11.2262	11.1564	10.3302	11.3202
mmu-miR-151-3p	11.7954	11.8718	11.9744	10.274	10.6444	11.1801	11.1042	10.5399	10.3639	11.2387	10.7448	10.6011	11.2237	11.3343	13.489	11.8311	11.1492	11.555	11.9496	10.9427	11.0342	11.2632	11.4861	10.8751	10.965	11.0748	11.3337	10.5689	11.0416	11.5956	10.9287	11.366	11.8588	11.0834	11.762	10.7722	9.80872	10.9399	10.002	10.1119	10.1124	11.1247	13.3602	12.1238	12.9818	10.9675	10.1318	12.7993	10.0905
mmu-miR-10b-5p	11.5848	10.8066	11.4628	12.8887	12.1653	11.107	10.5094	10.1309	10.4607	11.5176	10.7358	11.3801	11.3496	10.7223	11.2103	10.8815	10.4184	10.9483	10.8738	11.9141	10.277	11.6506	12.8388	11.6476	10.9223	11.0515	12.4656	11.44	12.2413	11.2791	10.4951	11.9246	10.9589	10.9065	11.8694	12.582	10.6072	10.1168	10.7538	10.8493	9.8922	10.1196	11.7663	11.2542	11.7956	10.2349	10.9981	11.5496	11.0037
mmu-miR-192-5p	11.1924	11.7215	11.1414	11.5049	11.5756	12.0848	11.6278	11.4637	11.4627	9.94247	10.8146	11.1027	10.5903	10.9109	11.2249	11.6059	10.6676	11.1635	10.8817	10.9563	11.2624	11.3529	12.7258	10.8872	9.88059	10.3498	13.0727	10.6842	10.626	11.737	11.0915	11.0531	10.7239	10.3774	11.7166	11.2716	10.5195	10.5323	10.4551	10.404	10.4772	10.2313	10.6559	12.1862	11.3004	11.9638	10.7515	11.5824	10.1613
mmu-miR-409-3p	11.5229	10.4599	10.7888	11.0524	10.5955	10.857	10.8036	10.1263	10.0165	12.2315	11.3204	10.4315	10.9953	10.905	10.2769	10.6315	10.4396	10.7805	11.298	11.2051	10.8286	11.1731	10.6331	11.0691	10.7734	11.1121	11.2659	11.2808	10.9109	10.4246	10.4107	10.6331	10.7406	10.9236	11.1508	10.8583	11.1767	11.1887	11.7211	11.7041	10.9463	11.2629	11.3703	10.3883	11.7538	10.5126	11.4145	11.4251	11.4552
mmu-let-7f-5p	10.8475	10.5164	10.6669	13.3603	12.0781	10.4743	10.8995	11.113	11.1178	10.9322	10.3072	10.9299	11.1458	10.1163	10.1993	10.8067	10.9439	10.7674	11.7181	11.3612	9.89311	11.2903	12.0301	12.3236	10.6962	10.6472	12.0965	11.0844	12.1411	10.6798	9.93501	11.1731	10.8316	10.0357	10.1259	11.5392	10.8432	10.1609	10.752	9.99674	10.3017	9.92082	10.7997	10.9882	11.3899	10.482	11.2358	10.1579	11.2705
mmu-miR-30c-5p	10.2932	10.8948	10.7608	11.6017	10.7143	9.97572	10.772	10.5228	10.7259	9.1707	10.4722	9.57851	10.1139	10.5726	11.1286	11.2361	11.2219	10.5673	11.7517	9.98781	10.5926	10.9829	10.6887	10.1932	10.3368	10.3613	10.995	10.2437	10.8651	11.1566	10.8429	10.288	10.9479	10.4055	10.7583	10.9308	10.8004	10.7719	10.974	11.0685	11.6075	11.3781	10.1206	10.9216	9.59762	10.6108	10.3756	10.4421	10.7674
mmu-miR-92a-3p	10.5566	10.4098	10.4335	11.0151	10.7477	10.5529	10.5958	10.4017	10.2562	11.773	10.8556	10.429	10.1693	10.4591	10.4137	11.1958	9.79511	9.78759	10.868	10.754	10.7533	10.7431	11.6576	11.4309	10.3665	10.6114	11.0861	11.636	10.95	10.9337	10.3904	10.8025	10.5368	10.1874	10.7056	11.2271	10.9155	10.7621	11.4693	10.6205	10.355	10.7894	10.9817	10.6459	11.0898	10.2749	11.1571	11.0163	11.0685
mmu-miR-215-5p	11.7737	11.2774	11.2394	12.8343	12.4436	11.5067	11.4183	11.9505	11.704	8.98846	10.9876	10.5172	9.48453	10.0981	10.2914	11.0768	10.1598	9.80637	9.38187	9.41733	10.0899	11.1133	11.8075	9.77303	9.23157	10.6939	13.6465	9.26475	11.3836	11.636	11.1076	11.4539	10.9624	10.2237	12.0258	12.033	10.0982	9.76328	10.07	10.1449	10.0223	9.40036	10.4469	11.7555	11.587	11.1709	10.6564	11.1769	9.93955
mmu-miR-495-3p	10.7423	11.2447	10.6069	9.90181	10.9814	10.5959	10.8973	11.7578	11.4639	8.64212	11.1191	10.1523	9.63459	10.6903	10.8086	11.1584	11.4384	9.94994	9.67235	10.8331	10.7161	10.6577	10.4301	9.6698	10.869	11.3054	9.74366	9.52934	10.459	11.3235	11.1859	10.6876	10.5306	10.5791	10.8726	10.8817	10.3191	10.6548	10.3004	11.1696	11.3451	10.8848	10.8688	11.0174	9.82891	10.7569	10.4584	10.5713	10.5685
mmu-miR-221-3p	10.2056	10.6255	10.3044	11.627	11.0215	10.0619	10.8796	11.325	11.2153	8.56569	10.4629	10.0526	9.44274	10.6652	10.6169	11.5665	10.8749	9.61378	11.2003	10.696	10.2987	10.569	11.1162	10.3478	10.3046	10.6992	11.0418	10.3605	10.6373	11.5246	10.572	10.6788	10.8387	10.4221	10.3644	10.945	10.2602	10.1427	10.6506	10.7377	11.1168	10.8917	10.5396	11.1737	10.0239	10.5043	10.425	10.6398	10.2502
mmu-miR-101a-3p	10.8181	10.5243	10.4386	13.296	11.1532	10.4825	11.4211	10.718	11.1244	9.68465	9.61628	10.7459	10.507	10.0924	9.15399	10.0833	10.901	10.6809	11.0838	10.9413	9.51869	11.2986	11.2709	11.845	9.83349	10.2078	11.4269	10.3117	12.3333	10.347	9.54896	10.5157	10.8189	10.3082	10.6885	11.5434	10.7952	9.87247	10.1585	9.70862	10.0937	9.10425	10.0606	10.599	10.8455	10.9784	10.3991	9.72915	10.8356
mmu-miR-126a-3p	9.60325	10.2344	10.3328	11.2949	9.9039	9.44227	10.5427	10.6342	11.0308	9.14683	10.3283	9.60387	9.88868	10.0397	10.3435	10.4858	11.0043	9.73228	11.528	10.6336	10.0531	10.2848	10.3991	11.0625	10.4203	10.463	10.5518	10.8052	10.9397	10.7074	10.1925	10.4932	10.6123	10.0024	10.189	10.2358	10.489	9.67988	10.3055	9.36857	10.3559	9.94238	11.0475	10.3996	9.47458	10.7551	10.8758	9.95275	10.9144
mmu-miR-29a-3p	9.80154	10.2568	10.2327	10.8342	11.015	10.1367	10.4431	10.7014	10.8667	8.35958	9.86853	10.0576	9.19566	9.99763	10.455	11.0416	10.5302	9.46791	10.2286	9.98329	10.0766	10.2201	11.161	10.0471	9.71362	10.0133	10.6498	9.84744	10.4476	11.0358	10.4112	10.4644	10.4466	10.1052	10.4509	10.5582	10.4248	9.69837	10.285	10.2377	10.6896	10.3736	9.54898	10.8235	9.11989	10.4878	10.002	9.97496	9.95562
mmu-miR-22-3p	10.0841	10.0583	10.0873	12.3965	11.1619	10.0225	10.0746	10.0378	10.2246	8.84823	9.92416	9.90481	9.32411	9.57557	10.6247	10.6535	10.2238	9.28071	12.195	10.2512	9.75202	10.2672	11.0725	10.5023	9.7925	9.93742	12.7403	10.0734	10.3668	10.9135	10.1113	10.2809	10.3829	10.0851	10.3669	10.6354	10.1232	9.52797	10.1015	10.1655	10.161	9.8123	9.88106	10.5874	9.75412	10.3204	10.0837	10.2439	10.0658
mmu-miR-10a-5p	10.6859	10.029	10.0589	12.235	12.3074	10.3057	9.80808	9.61133	10.0612	10.5833	10.109	10.4606	10.7378	10.0124	9.87531	9.86487	9.64131	10.2755	10.4063	10.9625	9.50552	11.0896	11.9657	10.7535	9.95221	10.357	11.528	10.532	11.7092	9.9246	9.68033	11.2997	10.3809	9.98163	10.7867	11.9417	9.54818	9.83621	9.62337	9.99617	9.20285	9.63339	10.2411	9.89435	10.8751	9.41875	10.1987	10.0055	10.289
mmu-miR-27a-3p	10.333	10.3887	10.8199	10.5336	11.1805	10.5609	10.3242	10.5652	10.5216	7.97212	9.67185	9.39475	8.43609	9.37366	11.1183	11.4065	11.0304	9.22197	10.1535	10.282	9.6452	10.1922	11.2555	9.83559	9.87275	10.1465	10.413	9.47702	10.4257	11.893	10.3206	10.6245	10.8642	10.2784	11.7481	10.5043	9.58464	8.92553	9.41768	9.61211	9.9123	9.50325	10.9449	11.6171	9.7348	10.9512	9.6923	10.8059	9.97564
mmu-let-7d-3p	9.21802	9.6761	9.60324	10.1033	9.70632	9.71511	9.68481	11.8364	11.6522	10.7398	10.6833	9.95319	9.39723	9.3397	10.5853	10.1624	9.2988	8.92442	10.0364	9.74665	10.093	9.70553	10.0612	9.72663	10.3965	10.8703	9.92355	10.0165	9.58487	10.0346	9.68603	10.6141	9.86735	9.81684	9.30266	10.0753	9.09159	10.5113	9.76505	10.2074	10.0785	10.9246	9.60278	9.6988	8.99415	9.06307	9.6585	9.83303	10.3149
mmu-miR-148b-3p	10.552	10.3297	9.64259	12.012	10.8314	9.72977	10.4692	9.87126	10.074	9.97586	9.31374	10.6705	10.2379	9.73933	9.04399	9.37341	9.65391	10.3149	11.7304	10.3879	9.35129	10.5749	10.316	10.1006	9.28983	9.84162	11.8288	9.68604	10.7045	9.55935	9.65461	9.91817	9.59945	9.80781	9.74182	10.85	10.0116	9.7912	9.99628	9.85344	9.7191	9.68632	9.24706	9.52539	9.95709	9.77716	9.69096	9.31449	9.60883
mmu-miR-433-3p	9.22861	9.70046	9.39549	11.7076	10.1401	9.0717	9.57972	9.47345	9.72655	10.1136	9.46357	8.65012	8.79979	9.02295	10.3458	10.2614	9.61045	8.74389	11.525	9.81718	9.41688	9.94131	10.9918	10.581	9.62156	9.39909	11.4171	10.5834	10.5616	10.3241	9.60175	9.62639	9.70043	9.35956	9.23976	11.0658	10.1413	9.9621	10.6165	10.248	10.175	10.3138	9.82089	9.9736	9.09283	9.06199	10.0689	9.65628	10.1095
mmu-miR-146a-5p	10.2772	9.73531	9.9039	11.2565	11.2267	9.79266	10.202	9.8685	10.2238	7.62042	9.4168	9.08026	8.45791	9.74583	9.31564	10.7643	10.5232	8.97704	10.4542	10.0766	9.50474	10.0673	11.266	9.7496	9.34015	9.93	11.1157	9.40218	10.7836	10.8183	10.3988	10.3831	10.3186	9.44275	10.7696	10.6529	9.35345	8.85191	9.26134	10.0185	10.0842	9.74571	9.98951	11.2404	9.53326	10.418	9.47882	10.1953	8.94049
mmu-miR-486a-3p	9.65098	9.72097	9.95074	8.76986	9.90017	9.07232	9.8154	10.1669	8.8766	10.6138	10.3495	10.5749	9.2704	9.068	9.81108	10.8907	8.71017	8.98176	10.1041	9.62362	10.518	9.96309	10.4322	9.75381	8.64885	10.1814	10.4489	10.8458	9.43738	10.1072	8.38001	10.0597	9.75071	9.01186	9.86586	10.2287	10.0346	9.41076	10.141	9.32261	9.29582	9.97642	10.7484	10.388	11.1541	9.23428	9.7779	10.9326	9.90117
mmu-miR-125b-1-3p	9.38756	10.1379	9.59368	9.38636	9.78658	9.83397	9.37965	10.1648	10.2234	10.9242	10.0083	10.5874	10.4595	10.0604	10.0106	9.9078	9.70074	10.134	9.83343	9.50749	9.93849	10.1269	9.57541	9.79528	9.8845	9.96168	10.1109	10.2735	9.31602	9.6616	9.62526	10.0754	9.11894	9.62013	9.13365	9.77059	10.1783	10.2918	10.4612	9.93044	9.7882	10.2058	9.6107	9.6205	9.7944	9.37739	10.2995	9.9886	9.80619
mmu-miR-423-3p	9.96199	9.36733	9.72997	10.0338	10.0132	9.66937	9.8341	8.89203	9.30402	9.42547	9.68957	7.80679	8.55729	10.1255	9.83817	9.86487	9.19864	8.03636	10.2234	9.89085	9.98471	9.56342	10.3117	10.491	9.62802	9.22913	10.236	10.9113	10.0138	9.97168	9.86408	9.66431	9.78016	9.74229	9.64954	9.81174	10.8189	10.2769	11.1673	10.4166	10.1593	10.7752	9.62875	9.75735	9.64806	9.48809	10.3474	9.83391	10.4917
mmu-miR-382-5p	10.3055	9.81497	9.57346	11.1585	10.7071	9.49334	9.78747	8.97963	9.60213	8.77744	9.22079	8.2221	8.69803	9.93836	9.29496	10.1114	9.96476	9.01023	10.774	9.84894	9.63776	10.3723	10.3385	10.0221	9.37004	9.67481	11.2987	10.0471	10.5698	9.97669	9.84316	9.73894	9.66928	9.59523	9.53154	10.9877	9.75214	9.62859	9.89631	10.194	10.2053	10.1359	9.61543	9.79262	10.1822	9.57514	9.77096	9.99603	9.4022
mmu-miR-30a-3p	10.4819	10.1729	9.72149	9.57581	10.0015	10.102	9.68817	10.812	10.6641	9.24581	9.86395	10.6175	9.98694	10.2437	9.1777	9.3081	9.81934	9.73865	9.56649	9.40998	9.86943	10.2652	9.65778	9.92759	8.93275	10.1121	9.38789	9.83181	10.162	9.1842	9.88965	10.7029	9.31704	9.21287	9.7556	10.3125	10.2602	9.96878	10.2498	9.56267	9.59481	10.3725	9.39471	9.40012	9.82526	9.78337	9.99007	9.44632	9.48219
mmu-miR-672-5p	10.5311	10.0481	9.54585	10.5983	9.55678	9.06921	9.70486	9.68481	9.69732	10.2827	9.83896	9.40327	10.3863	9.65326	9.49431	9.3247	10.1917	10.4057	11.0264	10.06	9.58976	10.4342	9.25706	10.0081	9.96305	10.2179	10.5254	10.0748	9.96603	9.36356	9.55188	9.99069	9.58972	9.34001	9.65307	10.0869	9.79218	9.72456	9.88217	9.52534	9.54007	9.72055	10.2818	9.28707	10.3733	9.50006	10.4768	9.576	10.04
mmu-miR-99b-3p	10.3947	10.172	9.75269	9.03977	9.83369	9.67921	9.63126	9.97222	9.91504	9.68125	9.4143	10.2421	10.1306	10.131	9.81197	9.8887	9.87548	10.3914	9.47158	9.4532	9.8064	10.1245	9.52075	9.3294	9.01455	9.968	9.5685	9.62349	9.83884	9.6385	9.67652	10.1554	9.66639	9.31291	9.67063	9.88517	9.76702	9.85197	9.87477	9.74663	9.68597	10.1897	9.98586	9.89568	10.056	9.54195	9.65645	9.98139	9.27784
mmu-miR-486b-3p	9.56069	9.52243	9.77585	8.33688	9.72494	8.89166	9.643	10.0617	8.66706	10.2849	10.0489	10.5135	9.06713	8.96226	9.47531	10.704	8.57093	8.84077	9.83186	9.36046	10.3316	9.75756	10.0896	9.25942	8.28688	10.0312	10.047	10.2979	9.18173	9.7539	8.20274	9.96614	9.54854	8.7428	9.73043	10.0432	9.72844	9.14675	9.78342	9.18372	9.07325	9.89968	10.529	10.0942	10.8967	9.04739	9.38272	10.6029	9.51028
mmu-miR-181d-5p	9.63973	9.5087	9.48641	10.5344	9.85639	9.03515	9.55001	9.87312	9.95904	7.49415	9.39728	8.74166	8.10289	9.0436	9.45985	10.1023	10.0119	8.46135	10.7376	9.69843	9.00012	9.61075	9.71824	9.33391	9.13599	9.50625	10.7802	9.09586	9.9297	10.2359	9.51693	9.55364	9.65126	9.31291	9.73794	9.56255	9.35907	8.97439	9.42472	9.42331	9.68766	9.45882	10.0821	9.95687	9.12074	9.99493	9.57036	9.55853	9.67808
mmu-miR-146b-5p	10.4758	9.82346	10.0306	11.0633	9.81247	8.68509	9.40285	9.93694	9.71142	7.55681	9.35742	8.83026	8.14469	8.71322	9.53518	10.2396	9.59054	8.44401	10.911	10.6731	8.79069	9.42982	10.8492	9.05883	9.13649	10.1617	11.1894	9.3832	9.91473	10.7215	9.58029	9.74003	8.88328	8.51764	9.92483	9.03918	9.00097	8.55791	8.69903	8.16335	8.57941	8.70499	11.4047	10.3597	11.1506	9.38387	9.65576	10.207	8.99605
mmu-miR-7a-5p	9.53826	9.49447	9.34298	10.9496	10.0073	9.19336	9.54354	9.66884	9.89921	9.62608	8.71336	9.77032	9.76831	9.25013	8.23621	8.89585	9.72307	10.0181	9.68316	9.70992	9.01276	10.1291	9.50222	10.2251	9.26192	9.39394	9.84144	9.63958	10.3744	8.95784	8.93802	9.80885	9.20514	9.03305	8.93929	10.5305	9.81487	9.38421	9.4255	8.87478	9.20001	9.15207	9.00054	9.37402	9.30268	9.4565	9.54395	8.49419	9.35493
mmu-miR-330-5p	9.42806	9.70712	9.5412	8.06658	9.5828	9.51455	9.66661	9.89064	9.92163	7.50189	9.35742	8.2001	8.31278	9.93173	9.41206	10.3175	9.90027	8.60201	8.90597	9.36707	9.90908	9.37928	9.19389	8.48418	9.08467	9.46487	8.8566	8.5649	9.29702	10.1393	10.0282	9.84436	9.69618	9.4171	9.507	9.35406	8.68897	9.30024	8.7157	9.56229	10.057	9.88051	9.48364	9.84783	8.65912	9.7322	8.68913	9.64552	8.96776
mmu-miR-30e-3p	9.61262	9.76661	9.11186	9.48747	9.23672	9.12004	9.2065	10.6466	10.4068	9.30121	9.49473	10.6173	10.2054	9.6096	8.51107	8.4977	9.61463	9.90063	9.52746	9.10276	9.22892	9.79538	8.83761	9.76638	8.64814	9.78049	8.95013	9.39988	9.82312	8.59285	9.11736	10.3136	8.91529	8.52868	9.08779	9.74896	9.97542	9.28078	9.71681	8.53769	9.09584	9.71759	8.9799	8.72195	8.91004	9.02823	9.71023	8.57086	9.37386
mmu-miR-361-5p	9.80072	9.80672	9.61981	10.0454	9.29822	9.43358	9.74696	9.88799	9.65417	7.78809	9.51999	8.29717	7.95056	8.80041	8.26687	9.56115	9.18185	8.3978	10.1434	9.3929	9.66344	9.48015	8.89285	8.55155	9.49833	10.142	9.67843	8.92838	9.88279	9.74485	10.4967	9.4539	9.92389	9.14022	9.96712	9.29437	8.45693	9.28121	8.95597	9.48983	9.99276	9.68891	9.06882	9.39787	8.353	10.0912	9.12106	8.93532	8.65651
mmu-miR-185-5p	8.59465	8.91382	9.40474	11.57	10.9939	9.28263	9.51591	9.37435	10.2694	6.09267	8.05653	7.75448	7.40666	8.73225	9.2714	9.83336	9.19256	7.77129	9.3772	9.56529	8.42657	10.2863	10.503	9.9126	8.76555	9.05199	10.0008	9.15219	10.739	10.2495	8.91298	9.80572	9.59672	8.95923	8.98631	10.3212	8.20547	8.86628	8.66773	8.66332	9.37941	9.56861	9.18051	10.3568	8.15794	9.23619	8.50207	8.92868	8.78528
mmu-miR-30e-5p	8.65388	9.20656	8.94948	11.0163	9.60272	8.20613	9.59009	9.22227	9.56443	6.78399	8.59451	8.52662	7.83441	8.17375	9.19966	9.64874	9.18441	7.94335	10.4135	9.47877	8.48219	9.36953	9.82562	9.32091	8.71109	9.08374	10.3736	8.81756	9.70133	10.4281	8.70802	9.11611	9.48662	8.88696	8.79631	9.71702	8.63899	8.05935	8.96566	9.03002	9.44127	8.26332	8.6971	9.48636	8.31857	9.23045	8.97601	8.55009	9.30523
mmu-miR-532-5p	10.251	9.34351	9.09545	9.54358	9.8629	8.9463	9.22397	9.48045	9.66749	8.24432	9.08094	9.97622	8.96463	9.13772	8.99774	9.14932	9.20066	8.50978	9.60449	9.74411	8.68954	9.41488	9.53633	9.86198	8.15676	9.43555	10.0357	9.45635	9.26501	9.27722	8.60274	9.46386	8.89023	8.81989	9.5122	9.38476	9.27233	8.6524	9.57217	8.72088	8.39792	8.64029	9.56823	9.07891	9.89256	9.2771	9.77349	9.02163	9.56727
mmu-miR-101c	9.4616	9.2636	9.06853	11.0908	9.59493	9.1905	9.95271	9.28671	9.5383	8.26835	8.14679	9.30847	9.08125	8.59986	7.58908	8.83837	9.81439	9.44412	9.11551	9.43223	8.16313	9.94296	9.4198	9.87325	8.44256	8.79138	9.46137	8.60381	10.3995	9.08898	8.34683	9.02666	9.43658	8.92564	9.62963	9.66457	9.41953	8.33702	8.72587	8.3032	8.87196	7.689	8.87662	9.33414	9.22529	9.90087	8.95389	8.37868	9.34496
mmu-miR-375-3p	9.43124	9.03923	8.75205	9.96431	9.15475	9.27778	9.13504	8.88761	8.91163	9.62387	9.08488	9.31029	9.3615	9.16813	9.1992	9.21046	9.03487	9.77154	10.1558	8.71606	9.23925	9.62107	9.60104	8.68726	8.99356	8.87845	10.618	9.13569	9.45552	9.21998	9.22092	9.24029	8.81755	8.3195	9.2573	9.61072	8.35929	8.53148	8.50311	8.56785	8.09967	8.56127	9.63615	9.49972	10.0357	8.80524	8.94382	9.43699	8.29017
mmu-miR-455-5p	9.01038	9.36693	9.17811	8.05664	9.17295	9.12364	9.18466	9.59037	9.60339	7.62397	8.76144	8.77618	8.4734	9.03243	8.63309	9.19752	9.80478	8.75949	8.0733	8.81709	9.28167	9.10147	8.38983	8.38988	8.59705	9.15412	8.08549	8.27355	9.0121	9.35659	9.64411	9.08805	9.20912	8.98579	9.17482	8.83941	9.23305	9.15065	8.82732	9.2429	9.70514	9.35367	8.24983	9.22999	7.81946	9.48207	8.79497	8.6053	8.78999
mmu-miR-1298-5p	10.3279	10.6026	8.74506	8.84155	9.72591	8.55136	9.26731	9.84741	9.32405	7.74796	8.58229	9.0502	8.88229	9.08746	8.50887	9.26831	9.58861	9.33949	9.87633	9.19523	8.67923	9.99277	8.18788	8.20162	8.15577	9.5469	10.1685	8.30833	8.72791	9.35694	9.28638	8.97188	8.50441	8.55204	9.332	8.77995	8.32522	8.3985	8.0523	8.35378	8.68818	8.55559	9.6008	9.29637	9.38039	9.14614	8.74431	8.97456	8.06008
mmu-miR-195a-3p	9.44807	9.32219	9.24945	8.77314	8.44517	8.81344	9.10267	9.07696	8.90959	8.49472	8.97787	8.96144	9.39263	9.18257	9.12751	8.89171	9.46324	9.71328	9.46685	8.90607	8.83533	9.15591	8.0725	7.9325	8.68582	9.20847	9.03043	7.80053	8.94802	8.40288	8.97634	9.33666	8.82846	8.55204	9.28034	8.38365	8.61099	9.19093	8.3505	8.92163	8.86001	9.38923	9.75489	9.00687	8.95414	8.94838	8.37962	8.98474	8.58788
mmu-miR-200a-3p	9.67232	9.55126	9.21403	10.469	10.0304	9.1985	8.74269	8.38276	9.09492	7.77537	8.28205	9.28469	7.7953	8.26099	9.59544	9.51881	8.9741	8.14843	10.8087	8.59395	7.96009	8.31576	9.58472	8.79585	8.79202	8.06763	10.7563	8.55913	8.67357	9.8369	9.04118	9.02935	9.60127	8.95749	9.40128	8.75454	8.5135	7.92483	8.49719	7.53339	8.21393	8.8961	10.1278	10.3773	9.94729	9.69521	8.2871	10.2612	7.94659
mmu-miR-124-3p	8.15646	8.53764	8.429	10.0142	8.70287	8.35059	8.81518	9.53984	10.322	7.47658	8.21312	8.7127	7.21334	8.24986	8.78969	9.25507	8.87374	7.38271	9.6048	8.55103	8.52734	8.89037	9.54149	9.02297	8.66431	8.53396	9.57196	9.18785	9.44395	9.7547	8.26597	9.22397	8.70821	8.22963	7.83242	9.39907	8.59201	8.411	8.90878	8.78876	9.32176	9.46993	8.1138	8.98503	7.45273	8.39438	8.66209	8.1654	8.52007
mmu-miR-1a-3p	8.31395	8.22238	9.65096	12.4077	11.9067	9.12004	8.38919	8.54566	9.30944	8.47322	7.36782	8.86439	8.63417	7.23605	9.33313	9.59721	10.0127	9.79322	9.15928	10.2593	7.66641	8.55826	11.7754	10.1792	8.83552	7.78814	9.81731	8.39502	11.0204	9.47816	7.78255	9.41199	9.35991	8.32222	10.589	9.80491	7.52394	7.92718	7.94977	6.37186	7.23677	7.7198	8.5623	10.8111	10.8756	8.70334	7.99592	9.69954	9.46095
mmu-miR-1981-5p	9.36447	9.59602	9.16647	9.18622	9.22346	8.52797	9.16309	8.83678	7.82272	7.47264	8.61319	6.94762	7.31099	8.64149	10.0865	10.5332	8.64037	8.10101	10.7469	8.79421	9.04845	9.1488	9.33324	7.18099	8.08127	9.25415	10.514	7.65216	8.99472	9.68544	8.41518	9.44118	9.22846	8.18848	9.65072	9.10343	6.84634	8.26586	6.86323	7.97309	7.9888	8.51032	11.1801	10.1478	10.4053	8.7615	7.04752	10.6763	6.65887
mmu-miR-134-5p	9.11464	8.99172	8.60164	9.51761	9.34502	8.80747	8.72725	9.04464	8.70984	8.64649	8.55413	8.79702	8.39991	8.99898	8.27379	9.17341	8.92967	8.73169	9.70913	8.43747	8.76167	8.87495	8.42905	8.19172	8.1	8.92464	10.0745	8.70647	8.57258	8.67865	8.66406	8.81681	8.57826	8.38515	8.87362	8.71731	8.82115	8.74811	9.17956	8.70009	8.86121	9.13504	8.80112	8.5609	8.07521	8.73541	8.73006	8.82516	8.15711
mmu-let-7e-5p	8.37902	7.96633	8.7923	10.4218	8.37822	8.75651	8.8501	8.51517	9.20034	9.061	8.22174	7.91403	8.74815	8.39653	8.36972	8.05829	8.03231	7.8766	9.47998	8.98945	8.41336	9.07271	9.04343	9.80099	9.56238	8.48018	9.61011	9.57861	9.39148	9.04238	7.6567	8.84959	9.02906	7.85194	7.8643	8.85992	9.22999	8.84755	9.14588	8.11181	8.61184	9.08992	8.63788	8.84716	9.00617	8.39779	9.32873	8.39082	9.22927
[truncated: 24 more columns]
