# Supplementary material for: Exosomal miRNAs as Novel Pharmacodynamic Biomarkers for Cancer Chemopreventive Agent Early Stage Treatments in Chemically Induced Mouse Model of Lung Squamous Cell Carcinoma
Source: Cancers (Basel). 2019 Apr 4;11(4):477. doi: 10.3390/cancers11040477 (PMC6520832; doi:10.3390/cancers11040477)
Supplement: Supplementary file 1 [file cancers-11-00477-s001.tgz › supplementary table 5.xlsx]

## Sheet: Sheet1
Supplementary table 5
Selected predictors for AZD6244 treatment
variables	Active.coefficients
(Intercept)	-3.8497
mmu-miR-101c	0.370855
mmu-miR-1298-5p	0.0430564
mmu-miR-129b-3p	-0.948175
mmu-miR-146b-5p	0.200393
mmu-miR-204-5p	0.14723
mmu-miR-215-5p	1.00708
mmu-miR-223-5p	0.49224
mmu-miR-370-3p	-0.615821
mmu-miR-708-3p	0.12634
mmu-miR-760-3p	-0.49602
mmu-miR-7a-1-3p	0.510243
Selected predictors for Budesonide treatment
variables	Active.coefficients
(Intercept)	-2.83208
mmu-miR-125a-5p	-0.866945
mmu-miR-132-3p	1.04474
mmu-miR-148a-5p	0.218804
mmu-miR-153-3p	0.200734
mmu-miR-16-5p	-0.0815145
mmu-miR-212-5p	2.11957
mmu-miR-30b-5p	0.0326691
mmu-miR-361-5p	-2.5015
mmu-miR-486a-3p	-0.284564
Selected predictors for XL-147 treatment
variables	Active.coefficients
(Intercept)	-2.57265
mmu-miR-183-5p	-0.491514
mmu-miR-184-3p	0.316261
mmu-miR-1964-3p	0.663294
mmu-miR-222-3p	1.50734
mmu-miR-23a-3p	0.225207
mmu-miR-363-3p	0.63272
mmu-miR-411-3p	0.0656882
mmu-miR-451a	0.190741
mmu-miR-486a-3p	0.0735081
